# Supplementary material
Source: publisher figshare collection journal article supplement (https://acs.figshare.com/ndownloader/files/4478644)
Supplement: Supplementary file 1 [file 4478644]

## Supporting Information

# Covalent Dispersion of Surfactant-Encapsulated Polyoxometalates and In-situ Incorporation of Metal Nanoparticles in Silica Spheres

*Yuanyuan Zhao, Wei Qi, Wen Li, and Lixin Wu\**

State Key Laboratory of Supramolecular Structure and Materials, Jilin University,

Changchun 130012, P. R. China

To whom correspondence should be addressed. E-mail: [wulx@jlu.edu.cn](mailto:wulx@jlu.edu.cn)

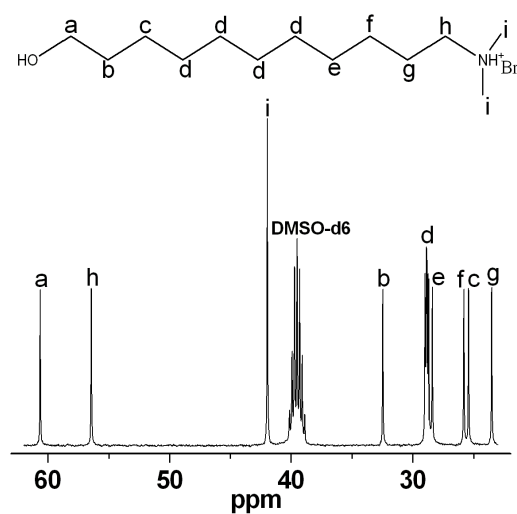

**Figure S1.**  $^{13}\text{C}$  NMR spectrum of HUDAH·Br.

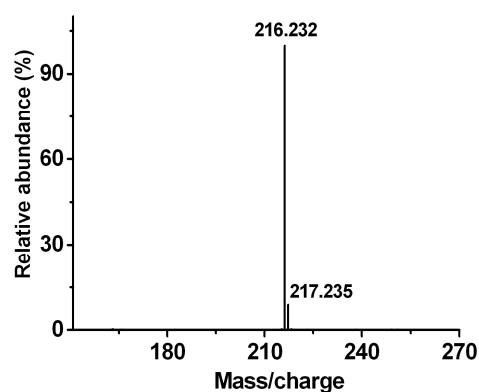

**Figure S2.** ESI-MS spectrum of HUDAH·Br. The marked molecular mass is assigned to the weight of  $C_{13}H_{30}N_1O_1(HUDAH^+)$ .

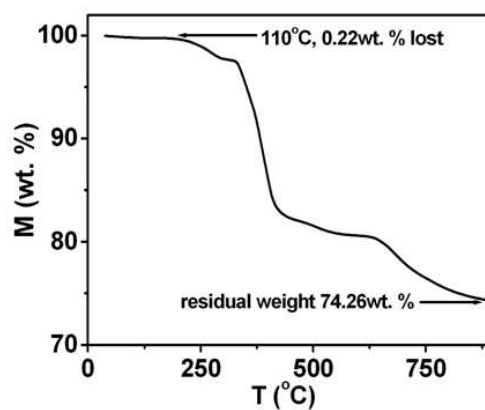

**Figure S3.** TGA curve of SEP-1.

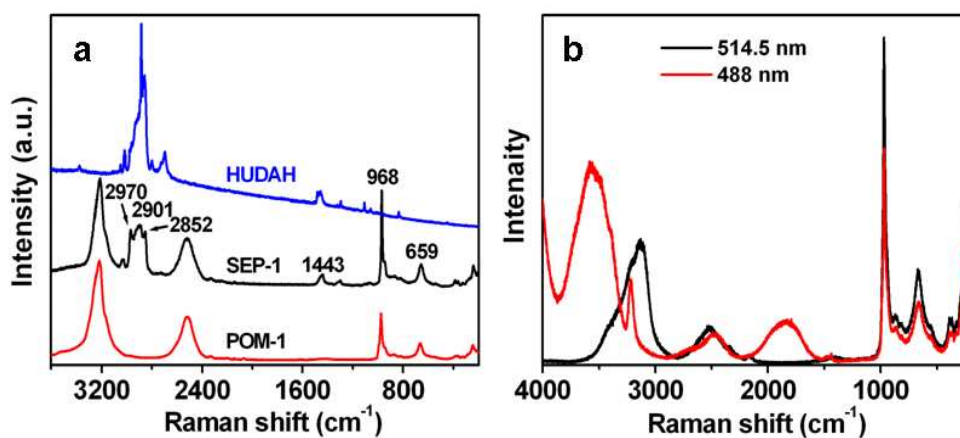

**Figure S4.** (a) Raman spectra of POM-1 (red), SEP-1 (black) and HUDAH (blue), excited with 514.5-nm laser; (b) Raman spectra of SEP-1, excited with 514.5-nm laser (black) and with 488-nm laser (red).

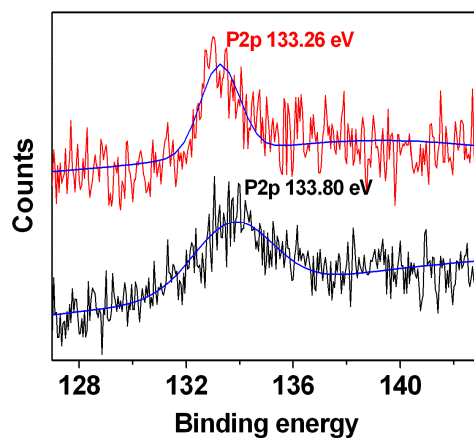

**Figure S5.** XPS spectra for P (2p) of pure POM-1 (red), and SEP-1/SiO<sub>2</sub> sphere (black).

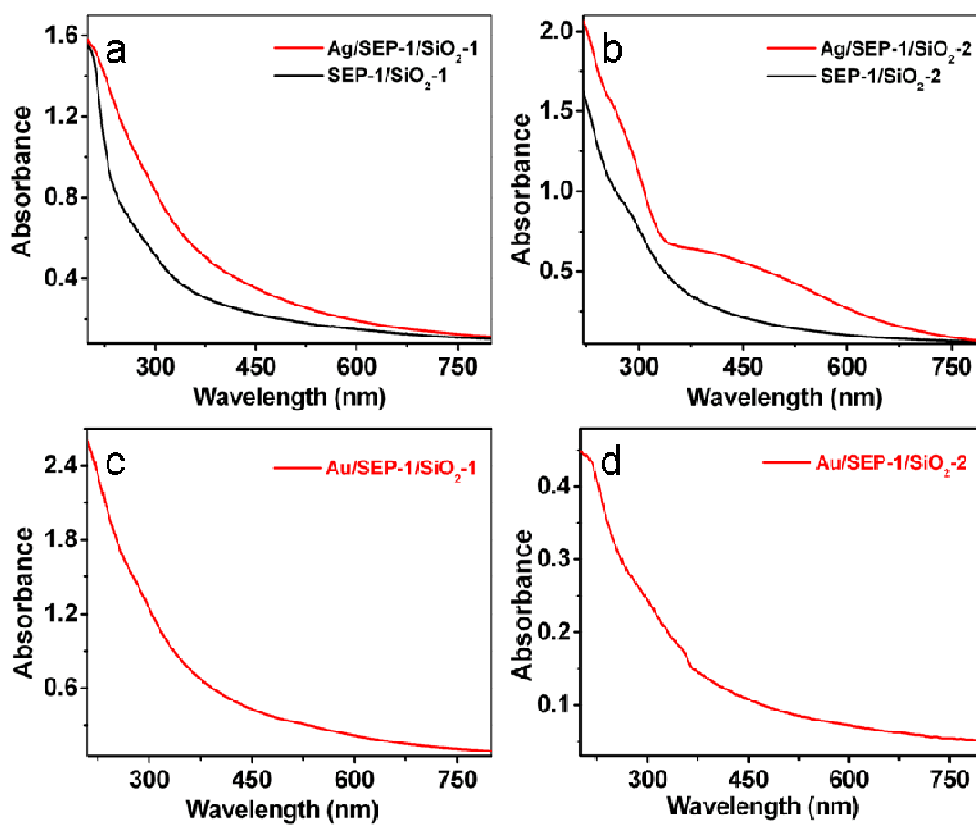

**Figure S6.** UV-vis spectra of (a) SEP-1/SiO<sub>2</sub>-1 solutions with and without Ag nanoparticles, (b) SEP-1/SiO<sub>2</sub>-2 solutions with and without Ag nanoparticles, (c) SEP-1/SiO<sub>2</sub>-1 and (d) SEP-1/SiO<sub>2</sub>-2 solutions with Au nanoparticles.

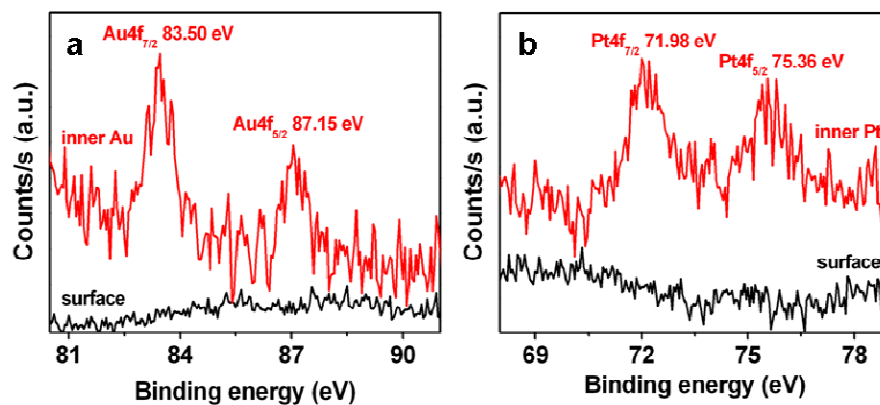

**Figure S7.** XPS spectra for (a) Au 4f on the surface (black) and in inner (red) of Au/SEP-1/SiO<sub>2</sub>-2 spheres, and (b) Pt 4f on the surface (black) and in inner (red) of Pt/SEP-1/SiO<sub>2</sub>-2 spheres.

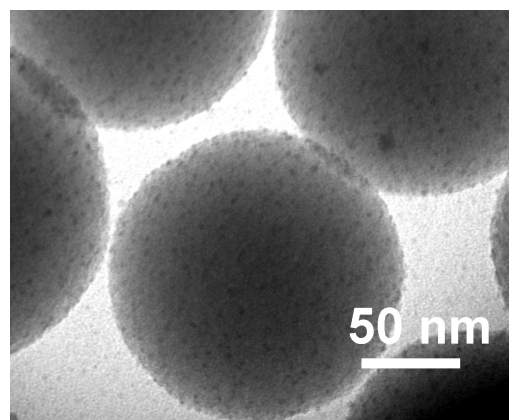

**Figure S8.** TEM image of SEP-1/SiO<sub>2</sub>-1, which undergoes primarily soaking in AgNO<sub>3</sub> solution and subsequent irradiation of UV light.

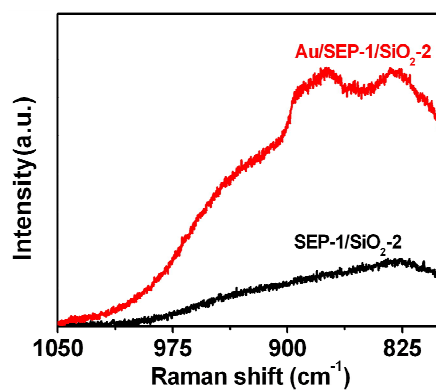

**Figure S9.** Raman spectra of SEP-1/SiO<sub>2</sub>-2 with (red) and without (black) Au nanoparticles, excited with 785-nm laser.
